# Supplementary material
Source: publisher figshare collection journal article supplement (https://acs.figshare.com/ndownloader/files/4600786)
Supplement: Supplementary file 1 [file 4600786]

#\#CIF_1.1
 
#  CIF produced by WinGX routine CIF_UPDATE
#  Created on 2008-02-05 at 12:46:51
#  Using CIFtbx version 2.6.2 16 Jun 1998
 
#  Dictionary name : cif_core.dic
#  Dictionary vers : 2.3
#  Request file    : c:\wingx\files\archive.dat
#  CIF files read  : fl892
 
 
data_fl892
 
_audit_creation_date                    2008-02-05T12:46:51-00:00
_audit_creation_method                  'WinGX routine CIF_UPDATE'
_audit_conform_dict_name                cif_core.dic
_audit_conform_dict_version             2.3
_audit_conform_dict_location            ftp://ftp.iucr.org/pub/cif_core.dic
_publ_requested_category                FO
 
#----------------------------------------------------------------------------#
#                   CHEMICAL INFORMATION                                     #
#----------------------------------------------------------------------------#
 
_chemical_name_systematic
;
 ?
;
_chemical_formula_sum                   'C16 H23 N O5'
_chemical_formula_weight                309.35
_chemical_absolute_configuration        unk
 
#----------------------------------------------------------------------------#
#                   UNIT CELL INFORMATION                                    #
#----------------------------------------------------------------------------#
 
_symmetry_cell_setting                  Orthorhombic
_symmetry_space_group_name_H-M          P212121
loop_
    _symmetry_equiv_pos_as_xyz
'x, y, z'
'-x+1/2, -y, z+1/2'
'x+1/2, -y+1/2, -z'
'-x, y+1/2, -z+1/2'
 
_cell_length_a                          7.221(5)
_cell_length_b                          10.099(3)
_cell_length_c                          20.920(13)
_cell_angle_alpha                       90
_cell_angle_beta                        90
_cell_angle_gamma                       90
_cell_volume                            1525.6(14)
_cell_formula_units_Z                   4
_cell_measurement_temperature           198(2)
_cell_measurement_reflns_used           20
_cell_measurement_theta_min             10
_cell_measurement_theta_max             12.5
 
#----------------------------------------------------------------------------#
#                   CRYSTAL INFORMATION                                      #
#----------------------------------------------------------------------------#
 
_exptl_crystal_description              Needle
_exptl_crystal_colour                   Colorless
_exptl_crystal_size_max                 0.5
_exptl_crystal_size_mid                 0.3
_exptl_crystal_size_min                 0.2
_exptl_crystal_density_diffrn           1.347
_exptl_crystal_density_method           'not measured'
_exptl_crystal_F_000                    664
_exptl_special_details
;
 ?
;
 
#----------------------------------------------------------------------------#
#                   ABSORPTION CORRECTION                                    #
#----------------------------------------------------------------------------#
 
_exptl_absorpt_coefficient_mu           0.1
_exptl_absorpt_correction_type          Psi-Scan
_exptl_absorpt_process_details          Empirical
_exptl_absorpt_correction_T_min         0.9518
_exptl_absorpt_correction_T_max         0.9803
 
#----------------------------------------------------------------------------#
#                   DATA COLLECTION                                          #
#----------------------------------------------------------------------------#
 
_diffrn_ambient_temperature             198(2)
_diffrn_radiation_wavelength            0.71073
_diffrn_radiation_type                  MoK\a
_diffrn_radiation_monochromator         graphite
_diffrn_measurement_device_type         CAD4
_diffrn_measurement_method              Omega/2theta
_diffrn_standards_number                1
_diffrn_standards_interval_count        100
_diffrn_standards_decay_%               0
_diffrn_reflns_av_R_equivalents         0
_diffrn_reflns_av_unetI/netI            0.0874
_diffrn_reflns_number                   1659
_diffrn_reflns_limit_h_min              0
_diffrn_reflns_limit_h_max              8
_diffrn_reflns_limit_k_min              0
_diffrn_reflns_limit_k_max              12
_diffrn_reflns_limit_l_min              0
_diffrn_reflns_limit_l_max              25
_diffrn_reflns_theta_min                1.95
_diffrn_reflns_theta_max                25.57
_diffrn_reflns_theta_full               25.5
_diffrn_measured_fraction_theta_full
                                        0.995
_diffrn_measured_fraction_theta_max
                                        0.992
_reflns_number_total                    1659
_reflns_number_gt                       976
_reflns_threshold_expression            >2sigma(I)
 
#----------------------------------------------------------------------------#
#                   COMPUTER PROGRAMS USED                                   #
#----------------------------------------------------------------------------#
 
_computing_data_collection              Difrac
_computing_cell_refinement              Difrac
_computing_data_reduction               NRCVAX
_computing_structure_solution           'SHELXS-97 (Sheldrick, 1997)'
_computing_structure_refinement         'SHELXL-97 (Sheldrick, 1997)'
 
#----------------------------------------------------------------------------#
#                   REFINEMENT INFORMATION                                   #
#----------------------------------------------------------------------------#
 
_refine_special_details
;
 Refinement of F^2^ against ALL reflections.  The weighted R-factor wR and
 goodness of fit S are based on F^2^, conventional R-factors R are based
 on F, with F set to zero for negative F^2^. The threshold expression of
 F^2^ > 2sigma(F^2^) is used only for calculating R-factors(gt) etc. and is
 not relevant to the choice of reflections for refinement.  R-factors based
 on F^2^ are statistically about twice as large as those based on F, and R-
 factors based on ALL data will be even larger.
;
_refine_ls_structure_factor_coef        Fsqd
_refine_ls_matrix_type                  full
_refine_ls_weighting_scheme             calc
_refine_ls_weighting_details
         'calc w=1/[\s^2^(Fo^2^)+(0.0413P)^2^+0.0000P] where P=(Fo^2^+2Fc^2^)/3'
_atom_sites_solution_primary            direct
_atom_sites_solution_secondary          difmap
_atom_sites_solution_hydrogens          geom
_refine_ls_hydrogen_treatment           none
_refine_ls_extinction_method            none
_refine_ls_number_reflns                1659
_refine_ls_number_parameters            201
_refine_ls_number_restraints            0
_refine_ls_R_factor_all                 0.1234
_refine_ls_R_factor_gt                  0.0514
_refine_ls_wR_factor_ref                0.0992
_refine_ls_wR_factor_gt                 0.0841
_refine_ls_goodness_of_fit_ref          0.958
_refine_ls_restrained_S_all             0.958
_refine_ls_shift/su_max                 0
_refine_ls_shift/su_mean                0
_refine_ls_abs_structure_details
                                    'Flack H D (1983), Acta Cryst. A39, 876-881'
_refine_ls_abs_structure_Flack          1(3)
_refine_diff_density_max                0.215
_refine_diff_density_min                -0.207
_refine_diff_density_rms                0.054
 
#----------------------------------------------------------------------------#
#                   ATOMIC TYPES, COORDINATES AND THERMAL PARAMETERS         #
#----------------------------------------------------------------------------#
 
loop_
    _atom_type_symbol
    _atom_type_description
    _atom_type_scat_dispersion_real
    _atom_type_scat_dispersion_imag
    _atom_type_scat_source
C C 0.0033 0.0016 'International Tables Vol C Tables 4.2.6.8 and 6.1.1.4'
H H 0 0 'International Tables Vol C Tables 4.2.6.8 and 6.1.1.4'
N N 0.0061 0.0033 'International Tables Vol C Tables 4.2.6.8 and 6.1.1.4'
O O 0.0106 0.006 'International Tables Vol C Tables 4.2.6.8 and 6.1.1.4'
 
loop_
    _atom_site_label
    _atom_site_type_symbol
    _atom_site_fract_x
    _atom_site_fract_y
    _atom_site_fract_z
    _atom_site_U_iso_or_equiv
    _atom_site_adp_type
    _atom_site_occupancy
    _atom_site_symmetry_multiplicity
    _atom_site_calc_flag
    _atom_site_refinement_flags
    _atom_site_disorder_assembly
    _atom_site_disorder_group
C1 C 0.3424(7) 0.3880(4) 0.1129(2) 0.0290(11) Uani 1 1 d . . .
C2 C 0.3802(6) 0.5297(4) 0.0935(2) 0.0270(11) Uani 1 1 d . . .
H2 H 0.314 0.5436 0.052 0.032 Uiso 1 1 calc R . .
C3 C 0.3113(6) 0.6444(4) 0.14014(18) 0.0252(10) Uani 1 1 d . . .
H3 H 0.1953 0.684 0.1224 0.03 Uiso 1 1 calc R . .
C4 C 0.4671(7) 0.7474(4) 0.13649(19) 0.0293(11) Uani 1 1 d . . .
H4 H 0.5407 0.7431 0.1769 0.035 Uiso 1 1 calc R . .
C5 C 0.4049(7) 0.8916(4) 0.1257(2) 0.0376(12) Uani 1 1 d . . .
H5A H 0.2766 0.893 0.109 0.045 Uiso 1 1 calc R . .
H5B H 0.4068 0.9401 0.1668 0.045 Uiso 1 1 calc R . .
C6 C 0.5331(8) 0.9581(4) 0.0787(2) 0.0434(13) Uani 1 1 d . . .
H6A H 0.4984 1.0525 0.0739 0.052 Uiso 1 1 calc R . .
H6B H 0.6621 0.954 0.0946 0.052 Uiso 1 1 calc R . .
C7 C 0.5363(7) 0.7577(5) 0.0176(2) 0.0322(12) Uani 1 1 d . . .
C8 C 0.5905(7) 0.6980(4) 0.08046(19) 0.0298(11) Uani 1 1 d . . .
H8 H 0.7217 0.7235 0.0897 0.036 Uiso 1 1 calc R . .
C9 C 0.7045(7) 0.4955(5) 0.1278(2) 0.0430(14) Uani 1 1 d . . .
H9A H 0.6848 0.538 0.1699 0.052 Uiso 1 1 calc R . .
H9B H 0.8343 0.5115 0.1147 0.052 Uiso 1 1 calc R . .
C10 C 0.6709(7) 0.3491(5) 0.1333(3) 0.0457(14) Uani 1 1 d . . .
H10A H 0.761 0.3101 0.1636 0.055 Uiso 1 1 calc R . .
H10B H 0.6895 0.3068 0.0911 0.055 Uiso 1 1 calc R . .
C11 C 0.4746(7) 0.3220(4) 0.1566(2) 0.0424(14) Uani 1 1 d . . .
H11A H 0.451 0.2254 0.1573 0.051 Uiso 1 1 calc R . .
H11B H 0.4589 0.3565 0.2006 0.051 Uiso 1 1 calc R . .
C12 C 0.1941(7) 0.3291(4) 0.0869(2) 0.0305(11) Uani 1 1 d . . .
H12 H 0.123 0.3754 0.0559 0.037 Uiso 1 1 calc R . .
C13 C 0.0515(8) 0.1334(4) 0.0541(2) 0.0473(15) Uani 1 1 d . . .
H13A H -0.0416 0.1911 0.0344 0.071 Uiso 1 1 calc R . .
H13B H -0.0091 0.0545 0.0715 0.071 Uiso 1 1 calc R . .
H13C H 0.1424 0.1068 0.0217 0.071 Uiso 1 1 calc R . .
C14 C 0.2747(7) 0.5982(4) 0.2072(2) 0.0318(12) Uani 1 1 d . . .
C15 C 0.0371(8) 0.5203(4) 0.2773(2) 0.0507(15) Uani 1 1 d . . .
H15A H -0.0956 0.5409 0.2838 0.061 Uiso 1 1 calc R . .
H15B H 0.1088 0.5668 0.3108 0.061 Uiso 1 1 calc R . .
C16 C 0.0659(8) 0.3757(4) 0.2836(2) 0.0519(15) Uani 1 1 d . . .
H16A H 0.0016 0.3298 0.2488 0.078 Uiso 1 1 calc R . .
H16B H 0.0166 0.3455 0.3248 0.078 Uiso 1 1 calc R . .
H16C H 0.1987 0.356 0.2815 0.078 Uiso 1 1 calc R . .
N1 N 0.5782(5) 0.5541(3) 0.08047(17) 0.0275(9) Uani 1 1 d . . .
O1 O 0.1430(5) 0.2029(3) 0.10426(13) 0.0438(9) Uani 1 1 d . . .
O2 O 0.3867(5) 0.5888(3) 0.24945(14) 0.0473(10) Uani 1 1 d . . .
O3 O 0.0952(5) 0.5678(3) 0.21420(14) 0.0394(9) Uani 1 1 d . . .
O4 O 0.5203(5) 0.8920(3) 0.01744(13) 0.0394(9) Uani 1 1 d . . .
O5 O 0.5095(5) 0.6997(3) -0.03170(13) 0.0381(9) Uani 1 1 d . . .
 
loop_
    _atom_site_aniso_label
    _atom_site_aniso_U_11
    _atom_site_aniso_U_22
    _atom_site_aniso_U_33
    _atom_site_aniso_U_23
    _atom_site_aniso_U_13
    _atom_site_aniso_U_12
C1 0.031(3) 0.027(2) 0.029(2) -0.003(2) 0.005(2) 0.005(2)
C2 0.029(3) 0.020(2) 0.031(3) -0.003(2) -0.004(2) 0.005(2)
C3 0.029(3) 0.018(2) 0.029(2) -0.0029(19) 0.001(2) 0.000(2)
C4 0.033(3) 0.024(2) 0.031(2) -0.005(2) 0.000(3) -0.002(2)
C5 0.042(3) 0.022(2) 0.049(3) -0.005(2) 0.008(3) -0.011(3)
C6 0.051(3) 0.025(2) 0.054(3) 0.003(2) 0.016(3) -0.008(3)
C7 0.023(3) 0.035(3) 0.039(3) 0.005(3) 0.008(3) -0.004(3)
C8 0.021(3) 0.029(2) 0.039(2) -0.002(2) 0.003(3) -0.009(2)
C9 0.028(3) 0.045(3) 0.056(3) 0.003(3) -0.006(3) 0.008(3)
C10 0.046(3) 0.036(3) 0.055(3) 0.000(3) -0.016(3) 0.013(3)
C11 0.060(4) 0.027(3) 0.041(3) -0.003(2) -0.007(3) 0.004(3)
C12 0.040(3) 0.024(2) 0.027(2) 0.000(2) 0.005(3) 0.000(3)
C13 0.063(4) 0.035(3) 0.044(3) -0.011(2) -0.004(3) -0.018(3)
C14 0.042(3) 0.019(2) 0.035(3) -0.007(2) -0.002(3) 0.000(3)
C15 0.055(4) 0.049(3) 0.048(3) 0.010(3) 0.026(3) -0.003(3)
C16 0.062(4) 0.042(3) 0.051(3) 0.004(3) -0.004(3) -0.007(3)
N1 0.024(2) 0.023(2) 0.036(2) -0.0015(17) -0.001(2) 0.0044(18)
O1 0.064(2) 0.0235(16) 0.0441(17) 0.0014(15) -0.001(2) -0.0104(18)
O2 0.058(2) 0.050(2) 0.0337(16) -0.0006(18) -0.009(2) -0.014(2)
O3 0.039(2) 0.0350(19) 0.044(2) 0.0030(17) 0.0111(18) -0.0047(17)
O4 0.045(2) 0.0279(17) 0.0458(18) 0.0057(16) 0.010(2) -0.0022(19)
O5 0.038(2) 0.0420(19) 0.0346(17) 0.0004(16) 0.0018(19) 0.0018(19)
 
 
#----------------------------------------------------------------------------#
#                   MOLECULAR GEOMETRY                                       #
#----------------------------------------------------------------------------#
 
_geom_special_details
;
 All esds (except the esd in the dihedral angle between two l.s. planes)
 are estimated using the full covariance matrix.  The cell esds are taken
 into account individually in the estimation of esds in distances, angles
 and torsion angles; correlations between esds in cell parameters are only
 used when they are defined by crystal symmetry.  An approximate (isotropic)
 treatment of cell esds is used for estimating esds involving l.s. planes.
;
loop_
    _geom_bond_atom_site_label_1
    _geom_bond_atom_site_label_2
    _geom_bond_distance
    _geom_bond_site_symmetry_2
    _geom_bond_publ_flag
C1 C12 1.340(6) . ?
C1 C11 1.480(6) . ?
C1 C2 1.513(6) . ?
C2 N1 1.476(5) . ?
C2 C3 1.595(5) . ?
C3 C14 1.501(6) . ?
C3 C4 1.534(5) . ?
C4 C5 1.541(5) . ?
C4 C8 1.555(5) . ?
C5 C6 1.509(6) . ?
C6 O4 1.448(5) . ?
C7 O5 1.202(5) . ?
C7 O4 1.362(5) . ?
C7 C8 1.498(6) . ?
C8 N1 1.456(5) . ?
C9 N1 1.471(5) . ?
C9 C10 1.502(6) . ?
C10 C11 1.524(7) . ?
C12 O1 1.375(5) . ?
C13 O1 1.426(5) . ?
C14 O2 1.202(5) . ?
C14 O3 1.341(6) . ?
C15 O3 1.466(5) . ?
C15 C16 1.481(6) . ?
 
loop_
    _geom_angle_atom_site_label_1
    _geom_angle_atom_site_label_2
    _geom_angle_atom_site_label_3
    _geom_angle
    _geom_angle_site_symmetry_1
    _geom_angle_site_symmetry_3
    _geom_angle_publ_flag
C12 C1 C11 124.5(4) . . ?
C12 C1 C2 117.1(4) . . ?
C11 C1 C2 118.4(4) . . ?
N1 C2 C1 112.5(4) . . ?
N1 C2 C3 107.1(4) . . ?
C1 C2 C3 117.8(3) . . ?
C14 C3 C4 112.7(4) . . ?
C14 C3 C2 113.6(3) . . ?
C4 C3 C2 103.5(3) . . ?
C3 C4 C5 115.8(4) . . ?
C3 C4 C8 103.9(3) . . ?
C5 C4 C8 111.1(3) . . ?
C6 C5 C4 109.7(4) . . ?
O4 C6 C5 109.4(4) . . ?
O5 C7 O4 118.0(4) . . ?
O5 C7 C8 126.8(4) . . ?
O4 C7 C8 115.2(4) . . ?
N1 C8 C7 112.7(4) . . ?
N1 C8 C4 106.5(3) . . ?
C7 C8 C4 112.5(4) . . ?
N1 C9 C10 110.3(4) . . ?
C9 C10 C11 110.6(4) . . ?
C1 C11 C10 108.7(4) . . ?
C1 C12 O1 121.2(4) . . ?
O2 C14 O3 123.5(5) . . ?
O2 C14 C3 126.4(5) . . ?
O3 C14 C3 110.1(4) . . ?
O3 C15 C16 111.3(4) . . ?
C8 N1 C9 111.4(4) . . ?
C8 N1 C2 103.1(3) . . ?
C9 N1 C2 114.2(4) . . ?
C12 O1 C13 112.7(3) . . ?
C14 O3 C15 116.8(4) . . ?
C7 O4 C6 116.8(3) . . ?
 
loop_
    _geom_torsion_atom_site_label_1
    _geom_torsion_atom_site_label_2
    _geom_torsion_atom_site_label_3
    _geom_torsion_atom_site_label_4
    _geom_torsion
    _geom_torsion_site_symmetry_1
    _geom_torsion_site_symmetry_2
    _geom_torsion_site_symmetry_3
    _geom_torsion_site_symmetry_4
    _geom_torsion_publ_flag
C12 C1 C2 N1 -136.7(4) . . . . ?
C11 C1 C2 N1 40.5(5) . . . . ?
C12 C1 C2 C3 98.0(5) . . . . ?
C11 C1 C2 C3 -84.7(5) . . . . ?
N1 C2 C3 C14 -108.4(4) . . . . ?
C1 C2 C3 C14 19.5(6) . . . . ?
N1 C2 C3 C4 14.2(4) . . . . ?
C1 C2 C3 C4 142.1(4) . . . . ?
C14 C3 C4 C5 -104.7(4) . . . . ?
C2 C3 C4 C5 132.1(4) . . . . ?
C14 C3 C4 C8 133.2(4) . . . . ?
C2 C3 C4 C8 10.0(4) . . . . ?
C3 C4 C5 C6 -138.8(4) . . . . ?
C8 C4 C5 C6 -20.6(5) . . . . ?
C4 C5 C6 O4 63.2(5) . . . . ?
O5 C7 C8 N1 -10.2(7) . . . . ?
O4 C7 C8 N1 171.2(4) . . . . ?
O5 C7 C8 C4 -130.6(5) . . . . ?
O4 C7 C8 C4 50.8(6) . . . . ?
C3 C4 C8 N1 -31.9(4) . . . . ?
C5 C4 C8 N1 -157.0(4) . . . . ?
C3 C4 C8 C7 92.1(4) . . . . ?
C5 C4 C8 C7 -33.1(5) . . . . ?
N1 C9 C10 C11 -62.1(5) . . . . ?
C12 C1 C11 C10 130.9(5) . . . . ?
C2 C1 C11 C10 -46.2(5) . . . . ?
C9 C10 C11 C1 55.8(5) . . . . ?
C11 C1 C12 O1 6.4(7) . . . . ?
C2 C1 C12 O1 -176.5(4) . . . . ?
C4 C3 C14 O2 -31.6(6) . . . . ?
C2 C3 C14 O2 85.8(5) . . . . ?
C4 C3 C14 O3 148.4(4) . . . . ?
C2 C3 C14 O3 -94.3(5) . . . . ?
C7 C8 N1 C9 154.3(4) . . . . ?
C4 C8 N1 C9 -81.9(4) . . . . ?
C7 C8 N1 C2 -82.9(5) . . . . ?
C4 C8 N1 C2 41.0(4) . . . . ?
C10 C9 N1 C8 172.3(4) . . . . ?
C10 C9 N1 C2 56.1(5) . . . . ?
C1 C2 N1 C8 -164.9(3) . . . . ?
C3 C2 N1 C8 -34.0(4) . . . . ?
C1 C2 N1 C9 -43.9(5) . . . . ?
C3 C2 N1 C9 87.0(4) . . . . ?
C1 C12 O1 C13 -150.7(4) . . . . ?
O2 C14 O3 C15 -0.3(6) . . . . ?
C3 C14 O3 C15 179.8(3) . . . . ?
C16 C15 O3 C14 -85.6(5) . . . . ?
O5 C7 O4 C6 173.4(4) . . . . ?
C8 C7 O4 C6 -7.9(6) . . . . ?
C5 C6 O4 C7 -49.7(6) . . . . ?
 
